# Supplementary material
Source: bioRxiv or medRxiv preprint supplement (https://www.biorxiv.org/highwire/filestream/51984/field_highwire_adjunct_files/6/173823-6.pdf)
Supplement: Supplementary file [file 173823-6.pdf]

Week 4

Week 6

Week 8

Week 12

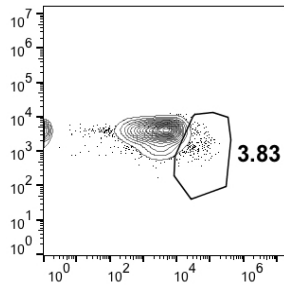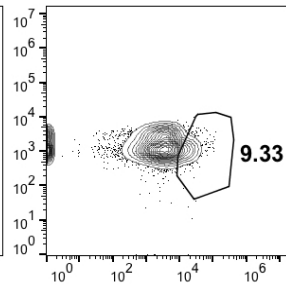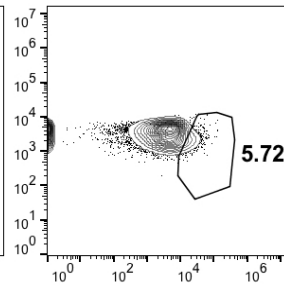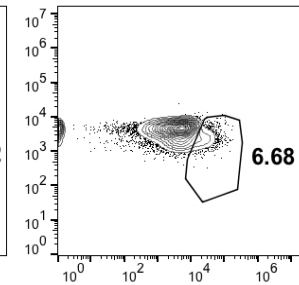

CD4

WT

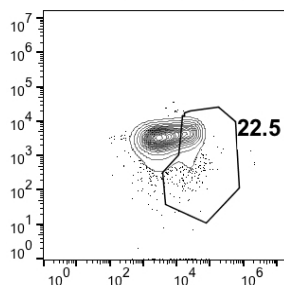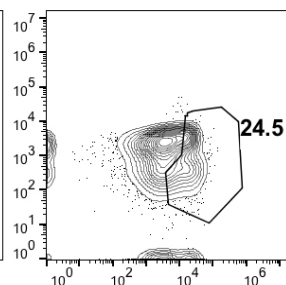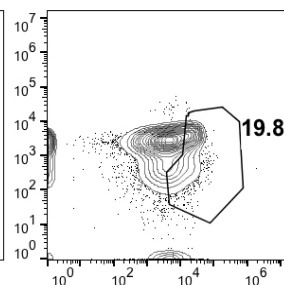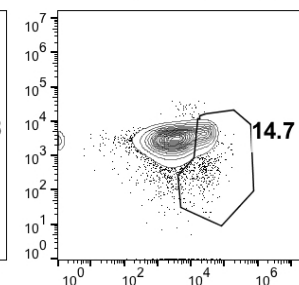

CD8

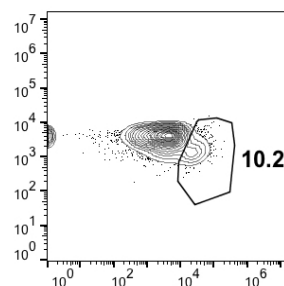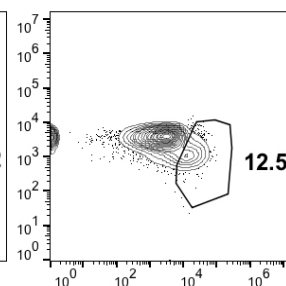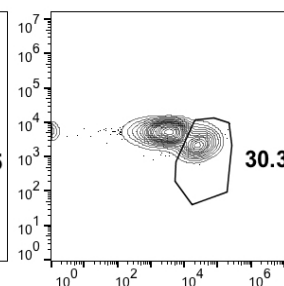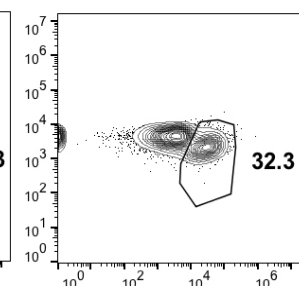

CD4

DNR

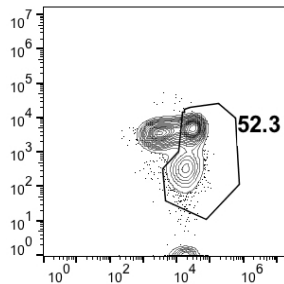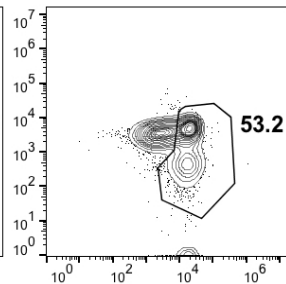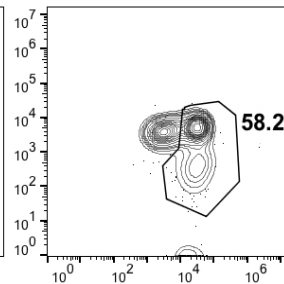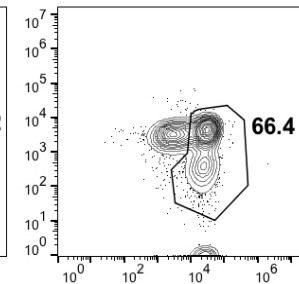

CD8

CD62L

CD44
